# Supplementary material for: Transformed Shoots of Dracocephalum forrestii W.W. Smith from Different Bioreactor Systems as a Rich Source of Natural Phenolic Compounds
Source: MDPI journal article supplement (doi:10.3390/molecules25194533), 2020-10-03
Supplement: s1 [file s1]

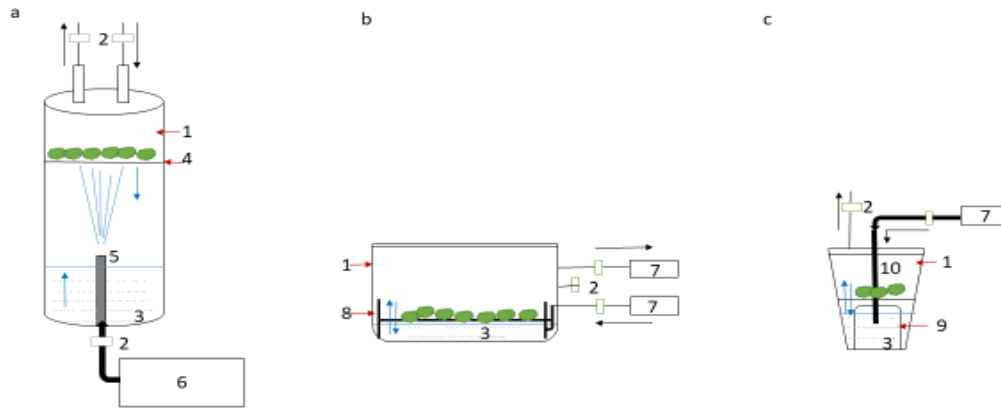

Figure S1. Diagrams of bioreactors: a) nutrient sprinkle bioreactor (NSB), b) Platform bioreactor, c) RITA: 1-growth vessel, 2-air filter, 3-growth medium, 4-stainless steel, 5-spray nozzle, 6-peristaltic pump, 7- air pump, 8-basket with 3 rows of small pores, 9- inner chamber, 10-compressed tube. Blue arrows indicate the flow direction of growth medium, black arrows indicate the flow direction of air.
